# Supplementary material for: Analysis of Participant Factors That Affect the Diagnostic Performance of Screening Mammography: A Report of the Alliance for Breast Cancer Screening in Korea
Source: PubMed Central journal article supplement — Korean J Radiol. 2017 May 19;18(4):624–31. doi: 10.3348/kjr.2017.18.4.624 (PMC5447638; doi:10.3348/kjr.2017.18.4.624), 2017-05-19
Supplement: kjr-18-624-s001.pdf [file kjr-18-624-s001.pdf]

**Supplementary Table 1. Distribution of Participants' Age, Breast Density, and Number of Visits to the same Institution According to Hospitals**

| No. of Hosp. | Total (n) | Age Group |       |       |      | BI-RADS Density* |      |      |      | Number of Visits |       |         |
|--------------|-----------|-----------|-------|-------|------|------------------|------|------|------|------------------|-------|---------|
|              |           | 40-49     | 50-59 | 60-69 | ≥ 70 | P1               | P2   | P3   | P4   | Once             | Twice | 3 Times |
| 1            | 28522     | 44.7      | 35.4  | 15.2  | 4.6  | 8.8              | 30.4 | 48.4 | 12.4 | 59.9             | 27.6  | 12.5    |
| 2            | 22541     | 34.4      | 38.2  | 22.5  | 5.0  | 24.1             | 39.5 | 30.4 | 6.0  | 58.7             | 29.1  | 12.2    |
| 3            | 14675     | 44.0      | 32.6  | 18.0  | 5.3  | 7.7              | 23.6 | 60.2 | 8.5  | 70.8             | 23.0  | 6.3     |
| 4            | 4960      | 25.5      | 35.5  | 30.2  | 8.7  | 7.4              | 27.6 | 59.0 | 6.0  | 70.7             | 21.4  | 8.0     |
| 5            | 9723      | 33.9      | 37.4  | 22.4  | 6.4  | 19.7             | 26.9 | 41.1 | 12.4 | 60.9             | 25.3  | 13.8    |
| 6            | 14106     | 31.5      | 38.6  | 23.6  | 6.3  | 10.9             | 13.8 | 68.1 | 7.2  | 59.9             | 27.6  | 12.5    |
| 7            | 9736      | 28.9      | 39.2  | 24.7  | 7.3  | 13.0             | 44.4 | 36.2 | 6.4  | 65.4             | 26.7  | 7.9     |
| 8            | 11988     | 29.0      | 38.2  | 26.2  | 6.5  | 15.6             | 32.2 | 39.5 | 12.7 | 64.6             | 23.4  | 12.0    |
| 9            | 6693      | 21.0      | 37.3  | 33.8  | 7.9  | 16.7             | 43.4 | 37.1 | 2.8  | 68.0             | 23.2  | 8.9     |
| 10           | 5812      | 30.6      | 36.6  | 25.3  | 7.4  | 17.3             | 34.4 | 43.1 | 5.2  | 64.0             | 24.7  | 11.3    |
| Total        | 128756    | 35.3      | 36.8  | 22.0  | 5.9  | 14.1             | 31.1 | 46.0 | 8.8  | 62.9             | 26.1  | 11.0    |

\*P1 = almost entirely fatty, P2 = scattered fibroglandular density, P3 = heterogeneously dense, P4 = extremely dense. BI-RADS = Breast Imaging-Reporting and Data System, Hosp. = hospital
