# Supplementary material for: Analysis of Participant Factors That Affect the Diagnostic Performance of Screening Mammography: A Report of the Alliance for Breast Cancer Screening in Korea
Source: PubMed Central journal article supplement — Korean J Radiol. 2017 May 19;18(4):624–31. doi: 10.3348/kjr.2017.18.4.624 (PMC5447638; doi:10.3348/kjr.2017.18.4.624), 2017-05-19
Supplement: kjr-18-624-s002.pdf [file kjr-18-624-s002.pdf]

**Supplementary Table 2. Diagnostic Performance of Screening Mammography in Terms of Fatty and Dense Breast**

|                                    | Fatty <sup>†</sup> | Dense <sup>‡</sup> |
|------------------------------------|--------------------|--------------------|
| Recall rate (%)                    | 7.5 (7.3–7.7)      | 28.7 (28.3–29.0)   |
| cOR                                | 1.00 (ref.)        | 4.99 (4.82–5.17)   |
| aOR*                               | 1.00 (ref.)        | 4.36 (4.20–4.53)   |
| CDR per 1000 examinations          | 1.8 (1.5–2.2)      | 3.4 (3.0–3.8)      |
| cOR                                | 1.00 (ref.)        | 1.85 (1.47–2.32)   |
| aOR*                               | 1.00 (ref.)        | 1.96 (1.52–2.53)   |
| PPV (%)                            | 2.5 (2.0–2.9)      | 1.2 (1.0–1.3)      |
| cOR                                | 1.00 (ref.)        | 0.47 (0.38–0.60)   |
| aOR*                               | 1.00 (ref.)        | 0.57 (0.44–0.74)   |
| Sensitivity (%)                    | 87.7 (81.9–93.5)   | 86.0 (81.9–90.1)   |
| cOR                                | 1.00 (ref.)        | 0.86 (0.45–1.63)   |
| aOR*                               | 1.00 (ref.)        | 1.33 (0.63–2.83)   |
| Specificity (%)                    | 92.7 (92.5–92.9)   | 71.6 (71.2–71.9)   |
| cOR                                | 1.00 (ref.)        | 0.20 (0.19–0.21)   |
| aOR*                               | 1.00 (ref.)        | 0.23 (0.22–0.24)   |
| FPR (%)                            | 7.3 (7.1–7.5)      | 28.5 (28.1–28.8)   |
| cOR                                | 1.00 (ref.)        | 5.06 (4.88–5.24)   |
| aOR*                               | 1.00 (ref.)        | 4.41 (4.24–4.58)   |
| ICR per 1000 negative examinations | 0.3 (0.1–0.4)      | 0.8 (0.5–1.0)      |
| cOR                                | 1.00 (ref.)        | 2.78 (1.54–5.05)   |
| aOR*                               | 1.00 (ref.)        | 1.98 (1.02–3.82)   |

\*Adjusted with age and number of visits to same institution, parentheses = 95% confidence interval, <sup>†</sup>P1 = almost entirely fatty, P2 = scattered fibroglandular density, <sup>‡</sup>P3 = heterogeneously dense, P4 = extremely dense. aOR = adjusted odds ratio, CDR = cancer detection rate, cOR = crude odds ratio, FPR = false positive rate, ICR = interval cancer rate, PPV = positive predictive value
